# Supplementary material for: Exercise compensates the metformin on T2DM-indcued muscle atrophy through autophagy prominent FLNC degradation
Source: Research Square preprint supplement (doi:10.21203/rs.3.rs-6749383/v1), 2025-06-03
Supplement: Supplementary file 1 [file 87da012949ead536a28dd55d.docx]

**Highlights**

FLNC disorder caused muscle atrophy in T2DM;

Metformin failed to improve FLNC degradation because of indolent lysosome;

Exercise promoted chaperone-assisted selective autophagy (CASA) in T2DM;

Muscle atrophy was improved by CASA dominated FLNC degradation.
